# Supplementary material
Source: PubMed Central journal article supplement (PMC7261481)

**HER3-targeted affibodies with optimized formats reduce ovarian cancer progression in a mouse xenograft model**

John S. Schardt, Madeleine Noonan-Shueh, Jinan M. Oubaid, Alex Eli Pottash, Sonya C. Williams, Arif Hussain, Rena G. Lapidus, Stanley Lipkowitz, Steven M. Jay

**Supplemental file**

**Affibody construct protein and DNA sequences:**

**1. Monovalent HER3 affibody:**

Protein:

AHHHHHHVVDNKFNKERYLAYYEIWQLPNLNRTQKAFIGSLQDDPSQSANLLAEAKK  
LNDAQAPK

DNA:

GCACATCACCACCACCATCACGTGGTCGATAACAAATTCAACAAAGAACGCTACTT  
AGCATATTACGAGATTTGGCAGTTACCGAACCTGAACCGGACCCAAAAAGCTGCGT  
TTATTGGCAGCTTGCAAGACGACCCGTCACAGAGCGCCAACCTGCTGGCCGAAGCG  
AAGAAGCTGAATGATGCGCAAGCACCCAAA

**2. Bivalent HER3 affibody (64 amino acid linker):**

Protein:

AHHHHHHVVDNKFNKERYLAYYEIWQLPNLNRTQKAFIGSLQDDPSQSANLLAEAKK  
LNDAQAPKGGASGAGGSEGGGSEGGTSGATASGAGGSEGGGSEGGTSGATASGAGGSE  
GGGSEGGTSGATGGVDNKFNKERYLAYYEIWQLPNLNRTQKAFIGSLQDDPSQSANL  
LAEAKKLNDAQAPK

DNA:

GCACATCACCACCACCATCACGTGGTCGATAACAAATTCAACAAAGAACGCTACTT  
AGCATATTACGAGATTTGGCAGTTACCGAACCTGAACCGGACCCAAAAAGCTGCGT  
TTATTGGCAGCTTGCAAGACGACCCGTCACAGAGCGCCAACCTGCTGGCCGAAGCG  
AAGAAGCTGAATGATGCGCAAGCACCCAAAGGCGGTGCCTCGGGCGCAGGGGGTA  
GCCAAGGCGGGGGCTCCGAAGGTGGCACCTCGGGAGCCACCGCATCAGGGGCAGG

GGGCAGCGAAGGCGGGCGGTTCGGAAGGGGGTACGTCAGGCGCGACCGCATCTGGG  
GCGGGTGGGAGCGAAGGCGGAGGGTCCGAGGGTGGCACATCAGGCGCTACCGGTG  
GTGTAGACAACAAATTTAACAAAGAGCGTTACCTGGCCTATTACGAAATTTGGCAAC  
TGCCGAATCTGAACCGGACGCAGAAAGCTGCTTTCATTGGCAGCCTGCAGGATGAC  
CCAAGCCAGTCGGCGAATCTTCTGGCTGAAGCGAAAAAGCTCAACGATGCACAAGC  
CCCTAAA

### **3. Bivalent HER3 affibody (GGG linker):**

Protein:

AHHHHHHVVDNKFNKERYLAYYEIWQLPNLNRTQKAFIGSLQDDPSQSANLLAEAKK  
LNDAQAPKGGGVVDNKFNKERYLAYYEIWQLPNLNRTQKAFIGSLQDDPSQSANLLAE  
AKKLNDAPK

DNA:

GCACATCACCACCACCATCACGTGGTCGATAACAAATTCAACAAAGAACGCTACTT  
AGCATATTACGAGATTTGGCAGTTACCGAACCTGAACCGGACCCAAAAAGCTGCGT  
TTATTGGCAGCTTGCAAGACGACCCGTCACAGAGCGCCAACCTGCTGGCCGAAGCG  
AAGAAGCTGAATGATGCGCAAGCACCCAAAGGCGGTGGTGTAGACAACAAATTTAA  
CAAAGAGCGTTACCTGGCCTATTACGAAATTTGGCAACTGCCGAATCTGAACCGGAC  
GCAGAAAGCTGCTTTCATTGGCAGCCTGCAGGATGACCCAAGCCAGTCGGCGAATC  
TTCTGGCTGAAGCGAAAAAGCTCAACGATGCACAAGCCCCTAAA

### **4. Hexavalent linear HER3 affibody**

Protein:

AHHHHHHVVDNKFNKERYLAYYEIWQLPNLNRTQKAFIGSLQDDPSQSANLLAEAKK  
LNDQAQPKGGGVVDNKFNKERYLAYYEIWQLPNLNRTQKAFIGSLQDDPSQSANLLAE  
AKKLNDQAQPKGGGVVDNKFNKERYLAYYEIWQLPNLNRTQKAFIGSLQDDPSQSANL  
LAEAKKLNDQAQPKGGGVVDNKFNKERYLAYYEIWQLPNLNRTQKAFIGSLQDDPSQS  
ANLLAEAKKLNDQAQPKGGGVVDNKFNKERYLAYYEIWQLPNLNRTQKAFIGSLQDDP  
SQSANLLAEAKKLNDQAQPKGGGVVDNKFNKERYLAYYEIWQLPNLNRTQKAFIGSLQ  
DDPSQSANLLAEAKKLNDQAQPK

DNA:

GCACATCACCACCACCATCACGTGGTCGATAACAAATTCAACAAAGAACGCTACTT  
AGCATATTACGAGATTTGGCAGTTACCGAACCTGAACCGGACCCAAAAAGCTGCGT  
TTATTGGCAGCTTGCAAGACGACCCGTCACAGAGCGCCAACCTGCTGGCCGAAGCG  
AAGAAGCTGAATGATGCGCAAGCACCCAAAGGCGGTGGTGTAGACAACAAATTTAA  
CAAAGAGCGTTACCTGGCCTATTACGAAATTTGGCAACTGCCGAATCTGAACCGGAC  
GCAGAAAGCTGCTTTCATTGGCAGCCTGCAGGATGACCCAAGCCAGTCGGCGAATC  
TTCTGGCTGAAGCGAAAAAGCTCAACGATGCACAAGCCCCTAAAGGCGGTGGTGTG  
GATAACAAATTCAACAAAGAACGCTACTTAGCATATTACGAGATTTGGCAGTTACCG  
AACCTGAACCGGACCCAAAAAGCTGCGTTTATTGGCAGCTTGCAAGACGACCCGTC  
ACAGAGCGCCAACCTGCTGGCCGAAGCGAAGAAGCTGAATGATGCGCAAGCACCCA  
AAGGCGGTGGTGTAGACAACAAATTTAACAAGAGCGTTACCTGGCCTATTACGAA  
ATTTGGCAACTGCCGAATCTGAACCGGACGCAGAAAGCTGCTTTCATTGGCAGCCTG  
CAGGATGACCCAAGCCAGTCGGCGAATCTTCTGGCTGAAGCGAAAAAGCTCAACGA  
TGCACAAGCCCCTAAAGGCGGTGGTGTGCGATAACAAATTCAACAAAGAACGCTACT  
TAGCATATTACGAGATTTGGCAGTTACCGAACCTGAACCGGACCCAAAAAGCTGCG

TTTATTGGCAGCTTGCAAGACGACCCGTCACAGAGCGCCAACCTGCTGGCCGAAGC  
GAAGAAGCTGAATGATGCGCAAGCACCCAAAGGCGGTGGTGTAGACAACAAATTTA  
ACAAAGAGCGTTACCTGGCCTATTACGAAATTTGGCAACTGCCGAATCTGAACCGG  
ACGCAGAAAGCTGCTTTCATTGGCAGCCTGCAGGATGACCCAAGCCAGTCGGCGAA  
TCTTCTGGCTGAAGCGAAAAAGCTCAACGATGCACAAGCCCCTAAA

### **5. Monovalent EGFR affibody:**

Protein:

AHHHHHHGGVDNKFNKEMWAAWEEIRNLPNLNGWQMTAFIASLVDDPSQSANLLAE  
AKKLNDAPK

DNA:

GCACATCACCACCACCATCACGGTGGTGTGGATAACAAATTTAACAAAGAGATGTG  
GGCGGCATGGGAAGAGATCCGTAATTTGCCTAACCTGAATGGCTGGCAAATGACCG  
CGTTTATCGCTAGTTTGGTTGATGACCCGAGTCAATCGGCGAACTTACTTGCAGAGG  
CGAAGAAATTAAACGACGCGCAGGCTCCGAAA

### **6. Bispecific HER3-EGFR bivalent affibody (64 AA linker):**

Protein:

AHHHHHHVVDNKFNKERYLAYYEIWQLPNLNRTQKAFIGSLQDDPSQSANLLAEAKK  
LNDAQAPKGGASGAGGSEGGGSEGGTSGATASGAGGSEGGGSEGGTSGATASGAGGSE  
GGGSEGGTSGATGGVDNKFNKEMWAAWEEIRNLPNLNGWQMTAFIASLVDDPSQSAN  
LLAEAKKLNDAPK

DNA:

GCACATCACCACCACCATCACGTGGTCGATAACAAATTCAACAAAGAACGCTACTT  
AGCATATTACGAGATTTGGCAGTTACCGAACCTGAACCGGACCCAAAAAGCTGCGT  
TTATTGGCAGCTTGCAAGACGACCCGTCACAGAGCGCCAACCTGCTGGCCGAAGCG  
AAGAAGCTGAATGATGCGCAAGCACCCAAAGGCGGTGCCTCGGGCGCAGGGGGTA  
GCCAAGGCGGGGGCTCCGAAGGTGGCACCTCGGGAGCCACCGCATCAGGGGCAGG  
GGGCAGCGAAGGCGGCGGTTCGGAAGGGGGTACGTCAGGCGCGACCGCATCTGGG  
GCGGGTGGGAGCGAAGGCGGAGGGTCCGAGGGTGGCACATCAGGCGCTACCGGTG  
GTGTGGATAACAAATTTAACAAAGAGATGTGGGCGGCATGGGAAGAGATCCGTAAT  
TTGCCTAACCTGAATGGCTGGCAAATGACCGCGTTTATCGCTAGTTTGGTTGATGAC  
CCGAGTCAATCGGCGAACTTACTTGCAGAGGCGAAGAAATTAACGACGCGCAGGC  
TCCGAAA

**7. Bispecific HER3-EGFR bivalent affibody (GGG linker):**

Protein:

AHHHHHHVVDNKFNKERYLAYYEIWQLPNLNRTQKAFIGSLQDDPSQSANLLAEAKK  
LNDAQAPKGGGVVDNKFNKEMWAAWEEIRNLPNLNGWQMTAFIASLVDDPSQSANLLA  
EAKKLNDAPK

DNA:

GCACATCACCACCACCATCACGTGGTCGATAACAAATTCAACAAAGAACGCTACTT  
AGCATATTACGAGATTTGGCAGTTACCGAACCTGAACCGGACCCAAAAAGCTGCGT  
TTATTGGCAGCTTGCAAGACGACCCGTCACAGAGCGCCAACCTGCTGGCCGAAGCG  
AAGAAGCTGAATGATGCGCAAGCACCCAAAGGCGGTGGTGTGGATAACAAATTTAA  
CAAAGAGATGTGGGCGGCATGGGAAGAGATCCGTAATTTGCCTAACCTGAATGGCT

GGCAAATGACCGCGTTTATCGCTAGTTTGGTTGATGACCCGAGTCAATCGGCGAACT  
TACTTGCAGAGGGCGAAGAAATTAACGACGCGCAGGCTCCGAAA

**8. Bivalent EGFR affibody (64 AA linker):**

Protein:

AHHHHHHVVDNKFNKEMWAAWEEIRNLPNLNGWQMTAFIASLVDDPSQSANLLAEA  
KKLNDAQAPKGGASGAGGSEGGGSEGGTSGATASGAGGSEGGGSEGGTSGATASGAG  
GSEGGGSEGGTSGATGGVDNKFNKEMWAAWEEIRNLPNLNGWQMTAFIASLVDDPSQ  
SANLLAEAKKL

DNA:

GCACATCACCACCACCATCACGTGGTGGATAACAAATTTAACAAAGAGATGTGGGC  
GGCATGGGAAGAGATCCGTAATTTGCCTAACCTGAATGGCTGGCAAATGACCGCGT  
TTATCGCTAGTTTGGTTGATGACCCGAGTCAATCGGCGAACTTACTTGCAGAGGGCGA  
AGAAATTAACGACGCGCAGGCTCCGAAAGGCGGTGCCTCGGGCGCAGGGGGTAG  
CGAAGGCGGGGGCTCCGAAGGTGGCACCTCGGGAGCCACCGCATCAGGGGCAGGG  
GGCAGCGAAGGCGGCGGTTTCGGAAGGGGGTACGTCAGGCGCGACCGCATCTGGGG  
CGGGTGGGAGCGAAGGCGGAGGGTCCGAGGGTGGCACATCAGGCGCTACCGGTGGT  
GTGGATAACAAATTTAACAAAGAGATGTGGGCGGCATGGGAAGAGATCCGTAATTT  
GCCTAACCTGAATGGCTGGCAAATGACCGCGTTTATCGCTAGTTTGGTTGATGACCC  
GAGTCAATCGGCGAACTTACTTGCAGAGGGCGAAGAAATTA

**9. Bivalent EGFR affibody (GGG linker):**

Protein:

AHHHHHHVVDNKFNKEMWAAWEEIRNLPNLNGWQMTAFIASLVDDPSQSANLLAEA

KKLNDAQAPKGGGVDNKFNKEMWAAWEEIRNLPNLNGWQMTAFIASLVDDPSQSANL  
LAEAKKLNDAQAPK

DNA:

GGCACATCACCACCACCATCACGTGGTGGATAACAAATTTAACAAAGAGATGTGGG  
CGGCATGGGAAGAGATCCGTAATTTGCCTAACCTGAATGGCTGGCAAATGACCGCG  
TTTATCGCTAGTTTGGTTGATGACCCGAGTCAATCGGCGAACCTTACTTGCAGAGGCG  
AAGAAATTAACGACGCGCAGGCTCCGAAAGGCGGTGGTGTGGATAACAAATTTAA  
CAAAGAGATGTGGGCGGCATGGGAAGAGATCCGTAATTTGCCTAACCTGAATGGCT  
GGCAAATGACCGCGTTTATCGCTAGTTTGGTTGATGACCCGAGTCAATCGGCGAACCT  
TACTTGCAGAGGCGAAGAAATTAACGACGCGCAGGCTCCGAAA

#### **10. Bivalent affibody HER3-Zwt (64 AA linker)**

Protein:

AHHHHHHVVDNKFNKERYLAYYEIWQLPNLNRTQKAFIGSLQDDPSQSANLLAEAKK  
LNDAQAPKGGASGAGGSEGGGSEGGTSGATASGAGGSEGGGSEGGTSGATASGAGGSE  
GGGSEGGTSGATGGVDNKFNKEQQNAFYEILHLPNLNEEQRNAFIQSLKDDPSQSANLL  
AEAKKLNDAQAPK

DNA:

GCACATCACCACCACCATCACGTGGTCGATAACAAATTCAACAAAGAACGCTACTT  
AGCATATTACGAGATTTGGCAGTTACCGAACCTGAACCGGACCCAAAAAGCTGCGT  
TTATTGGCAGCTTGCAAGACGACCCGTCACAGAGCGCCAACCTGCTGGCCGAAGCG  
AAGAAGCTGAATGATGCGCAAGCACCCAAAGGCGGTGCCTCGGGCGCAGGGGGTA  
GCCAAGGCGGGGGCTCCGAAGGTGGCACCTCGGGAGCCACCGCATCAGGGGCAGG



GGGCAGCGAAGGCGGCGGTTCGGAAGGGGGTACGTCAGGCGCGACCGCATCTGGG  
GCGGGTGGGAGCGAAGGCGGAGGGTCCGAGGGTGGCACATCAGGCGCTACCGGTG  
GTGTAGACAACAAATTTAACAAAGAGCAGCAGAACGCTTTCTATGAAATACTGCAC  
TTACCGAACCTGAACGAGGAGCAGCGGAATGCTTTTATACAGTCGTTGAAGGATGA  
CCCAAGCCAGTCGGCGAATCTTCTGGCTGAAGCGAAAAAGCTCAACGATGCACAAG  
CCCCTAAA

### **11. Monovalent HER3-ABD affibody**

Protein:

AHHHHHHVVDNKFNKERYLAYYEIWQLPNLNRTQKAFIGSLQDDPSQSANLLAEAKK  
LNDAQAPKGGGLAEAKVLANRELDKYGVSDFYKRLINKAKTVEGVEALKLHILAALP

DNA:

GCACATCACCACCACCATCACGTGGTCGATAACAAATTCAACAAAGAACGCTACTT  
AGCATATTACGAGATTTGGCAGTTACCGAACCTGAACCGGACCCAAAAAGCTGCGT  
TTATTGGCAGCTTGCAAGACGACCCGTCACAGAGCGCCAACCTGCTGGCCGAAGCG  
AAGAAGCTGAATGATGCGCAAGCACCCAAAGGAGGGGGACTTGCAGAAGCCAAAG  
TCTTAGCGAATAGAGAACTGGATAAATATGGCGTGTCCGACTTCTATAAGCGTCTGA  
TAAATAAAGCGAAGACCGTTGAGGGAGTTGAAGCCCTGAAGTTGCATATTTTGGCT  
GCCCTTCCA

### **12. Monovalent ABD-HER3 affibody**

Protein:

AHHHHHHGGGLAEAKVLANRELDKYGVSDFYKRLINKAKTVEGVEALKLHILAALPG

GGVDNKFNKERYLAYYEIWQLPNLNRTQKAFIGSLQDDPSQSANLLAEAKKLNDAQA  
PK

DNA:

GCACATCACCACCACCATCACGGCGGTGGTCTTGCAGAAGCCAAAGTCTTAGCGAA  
TAGAGAACTGGATAAATATGGCGTGTCCGACTTCTATAAGCGTCTGATAAATAAAGC  
GAAGACCGTTGAGGGAGTTGAAGCCCTGAAGTTGCATATTTTGGCTGCCCTTCCAGG  
AGGGGGAGTCGATAACAAATTCAACAAAGAACGCTACTTAGCATATTACGAGATTT  
GGCAGTTACCGAACCTGAACCGGACCCAAAAAGCTGCGTTTATTGGCAGCTTGCAA  
GACGACCCGTCACAGAGCGCCAACCTGCTGGCCGAAGCGAAGAAGCTGAATGATGC  
GCAAGCACCCAAA

### 13. Bivalent HER3-HER3-ABD

Protein:

AHHHHHHVVDNKFNKERYLAYYEIWQLPNLNRTQKAFIGSLQDDPSQSANLLAEAKK  
LNDAQAPKGGGVDNKFNKERYLAYYEIWQLPNLNRTQKAFIGSLQDDPSQSANLLAE  
AKKLNDAQAPKGGGLAEAKVLANRELDKYGVSDFYKRLINKAKTVEGVEALKLHILA  
ALP

DNA:

GCACATCACCACCACCATCACGTGGTCGATAACAAATTCAACAAAGAACGCTACTT  
AGCATATTACGAGATTTGGCAGTTACCGAACCTGAACCGGACCCAAAAAGCTGCGT  
TTATTGGCAGCTTGCAAGACGACCCGTCACAGAGCGCCAACCTGCTGGCCGAAGCG  
AAGAAGCTGAATGATGCGCAAGCACCCAAAGGCGGTGGTGTAGACAACAAATTTAA  
CAAAGAGCGTTACCTGGCCTATTACGAAATTTGGCAACTGCCGAATCTGAACCGGAC

GCAGAAAGCTGCTTTCATTGGCAGCCTGCAGGATGACCCAAGCCAGTCGGCGAATC  
TTCTGGCTGAAGCGAAAAAGCTCAACGATGCACAAGCCCCTAAAGGAGGGGGACTT  
GCAGAAGCCAAAGTCTTAGCGAATAGAGAACTGGATAAATATGGCGTGTCCGACTT  
CTATAAGCGTCTGATAAATAAAGCGAAGACCGTTGAGGGAGTTGAAGCCCTGAAGT  
TGCATATTTTGGCTGCCCTTCCA

#### 14. Bivalent ABD-HER3-HER3

Protein:

AHHHHHHGGGLAEAKVLANRELDKYGVSDFYKRLINKAKTVEGVEALKLHILAAALPG  
GGVDNKFNKERYLAYYEIWQLPNLNRTQKAFIGSLQDDPSQSANLLAEAKKLNDQA  
PKGGVDNKFNKERYLAYYEIWQLPNLNRTQKAFIGSLQDDPSQSANLLAEAKKLND  
AQAPK

DNA:

GCACATCACCACCACCATCACGGCGGTGGTCTTGCAGAAGCCAAAGTCTTAGCGAA  
TAGAGAACTGGATAAATATGGCGTGTCCGACTTCTATAAGCGTCTGATAAATAAAGC  
GAAGACCGTTGAGGGAGTTGAAGCCCTGAAGTTGCATATTTTGGCTGCCCTTCCAGG  
AGGGGGAGTCGATAACAAATTCAACAAAGAACGCTACTTAGCATATTACGAGATTT  
GGCAGTTACCGAACCTGAACCGGACCCAAAAAGCTGCGTTTATTGGCAGCTTGCAA  
GACGACCCGTCACAGAGCGCCAACCTGCTGGCCGAAGCGAAGAAGCTGAATGATGC  
GCAAGCACCCAAAGGCGGTGGTGTAGACAACAAATTTAACAAAGAGCGTTACCTGG  
CCTATTACGAAATTTGGCAACTGCCGAATCTGAACCGGACGCAGAAAGCTGCTTTCA  
TTGGCAGCCTGCAGGATGACCCAAGCCAGTCGGCGAATCTTCTGGCTGAAGCGAAA  
AAGCTCAACGATGCACAAGCCCCTAAA

### 15. Bivalent HER3-ABD-HER3

Protein:

AHHHHHHVVDNKFNKERYLAYYEIWQLPNLNRTQKAFIGSLQDDPSQSANLLAEAKK  
LNDAQAPKGGGLAEAKVLANRELDKYGVSDFYKRLINKAKTVEGVEALKLHILAAALPG  
GGVDNKFNKERYLAYYEIWQLPNLNRTQKAFIGSLQDDPSQSANLLAEAKKLNDQA  
PK

DNA:

GCACATCACCACCACCATCACGTGGTCGATAACAAATTCAACAAAGAACGCTACTT  
AGCATATTACGAGATTTGGCAGTTACCGAACCTGAACCGGACCCAAAAAGCTGCGT  
TTATTGGCAGCTTGCAAGACGACCCGTCACAGAGCGCCAACCTGCTGGCCGAAGCG  
AAGAAGCTGAATGATGCGCAAGCACCCAAAGGCGGTGGTCTTGCAGAAGCCAAAGT  
CTTAGCGAATAGAGAACTGGATAAATATGGCGTGTCCGACTTCTATAAGCGTCTGAT  
AAATAAAGCGAAGACCGTTGAGGGAGTTGAAGCCCTGAAGTTGCATATTTTGGCTG  
CCCTTCCAGGAGGGGGAGTAGACAACAAATTTAACAAAGAGCGTTACCTGGCCTAT  
TACGAAATTTGGCAACTGCCGAATCTGAACCGGACGCAGAAAGCTGCTTTCATTGGC  
AGCCTGCAGGATGACCCAAGCCAGTCGGCGAATCTTCTGGCTGAAGCGAAAAAGCT  
CAACGATGCACAAGCCCCTAAA

## Figure legends

**Figure S1: Immunoblot quantification of Figure 1.** Quantified A. pHER3 B. pAkt and C. HER3 values are displayed for Figure 1. Blots were quantified using Odyssey CLx image system (Licor) Analysis Tool and normalized to  $\beta$ -actin. Results shown are mean +/- SEM of three independent experiments.

**Figure S2: Immunoblot quantification of Figure 2.** Quantified A. pHER3 B. pAkt and C. HER3 values are displayed for Figure 2. Blots were quantified using Odyssey CLx image system (Licor) Analysis Tool and normalized to  $\beta$ -actin. Results shown are mean +/- SEM of three independent experiments.

**Figure S3: Immunoblot quantification of Figure 3.** Quantified A. HER3 and B. EGFR values are displayed for Figure 3. Blots were quantified using Odyssey CLx image system (Licor) Analysis Tool and normalized to  $\beta$ -actin. Results shown are mean +/- SEM of three independent experiments.

**Figure S4: Immunoblot quantification of Figure 4 (pHER3 and pAkt).** Quantified A., B. pHER3 and B., C. pAkt values are displayed for Figure 4. Blots were quantified using Odyssey CLx image system (Licor) Analysis Tool and normalized to  $\beta$ -actin. Results shown are mean +/- SEM of three independent experiments.

**Figure S5: Immunoblot quantification of Figure 4 (HER3).** Quantified A, B. HER3 values are displayed for Figure 4. Blots were quantified using Odyssey CLx image system (Licor) Analysis

Tool and normalized to  $\beta$ -actin. Results shown are mean  $\pm$  SEM of three independent experiments.

**Figure S6: Raw blots for Figure 1.** Full length blots for Figure 1B, 1C (multiple exposures), and 1D are shown.

**Figure S7: Raw blots for Figure 2.** Full length blots for Figure 2B, 2C (multiple exposures), and 2D are shown.

**Figure S8: Raw blots for Figure 3.** Full length blots for Figure 3B, 3C, and 3D are shown.

**Figure S9: Raw blots for Figure 4.** Full length blots for Figure 4B, 4C (multiple exposures), 4D, and 4E are shown.

Figure S1

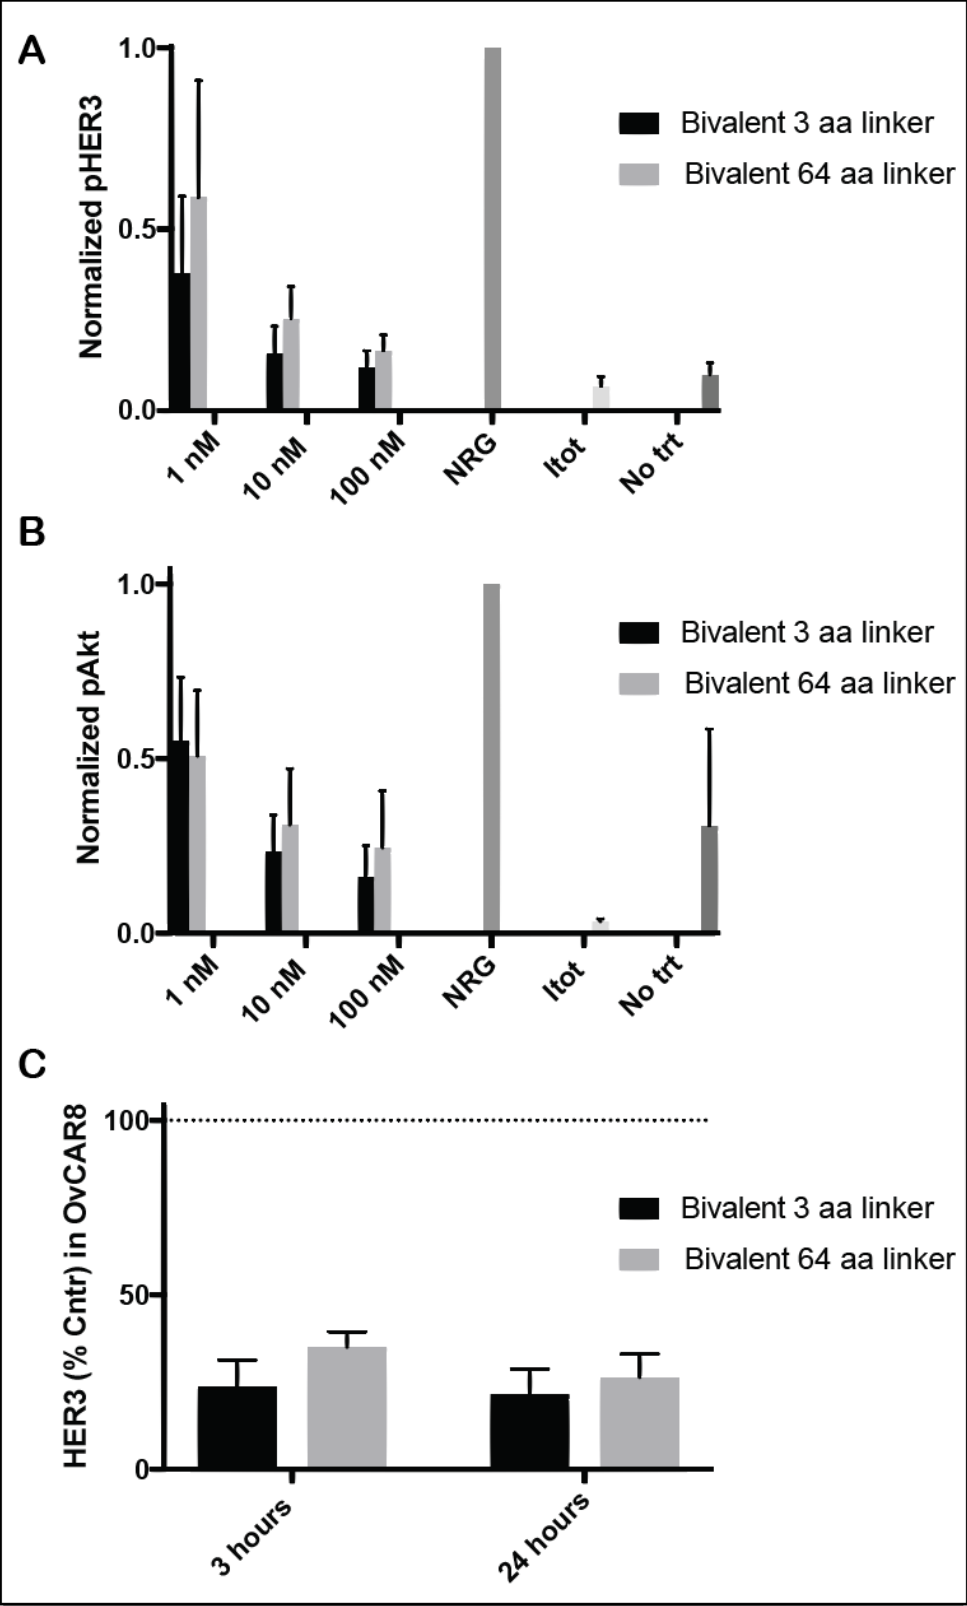

Figure S2

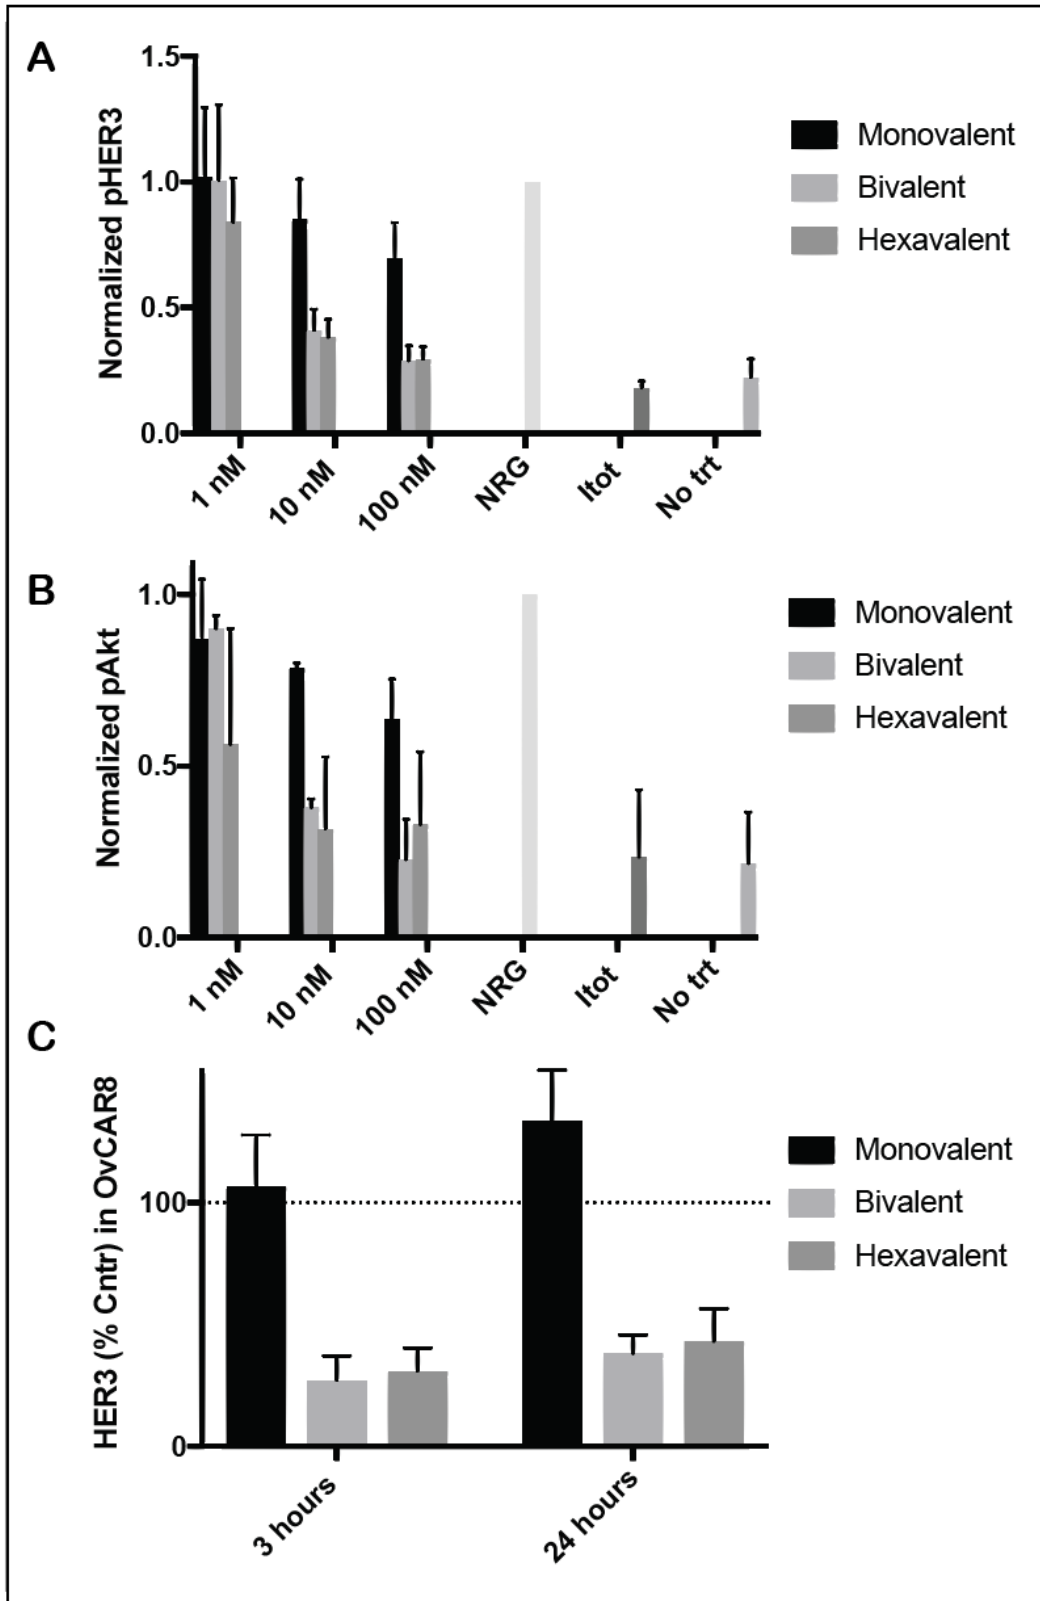



Figure S3

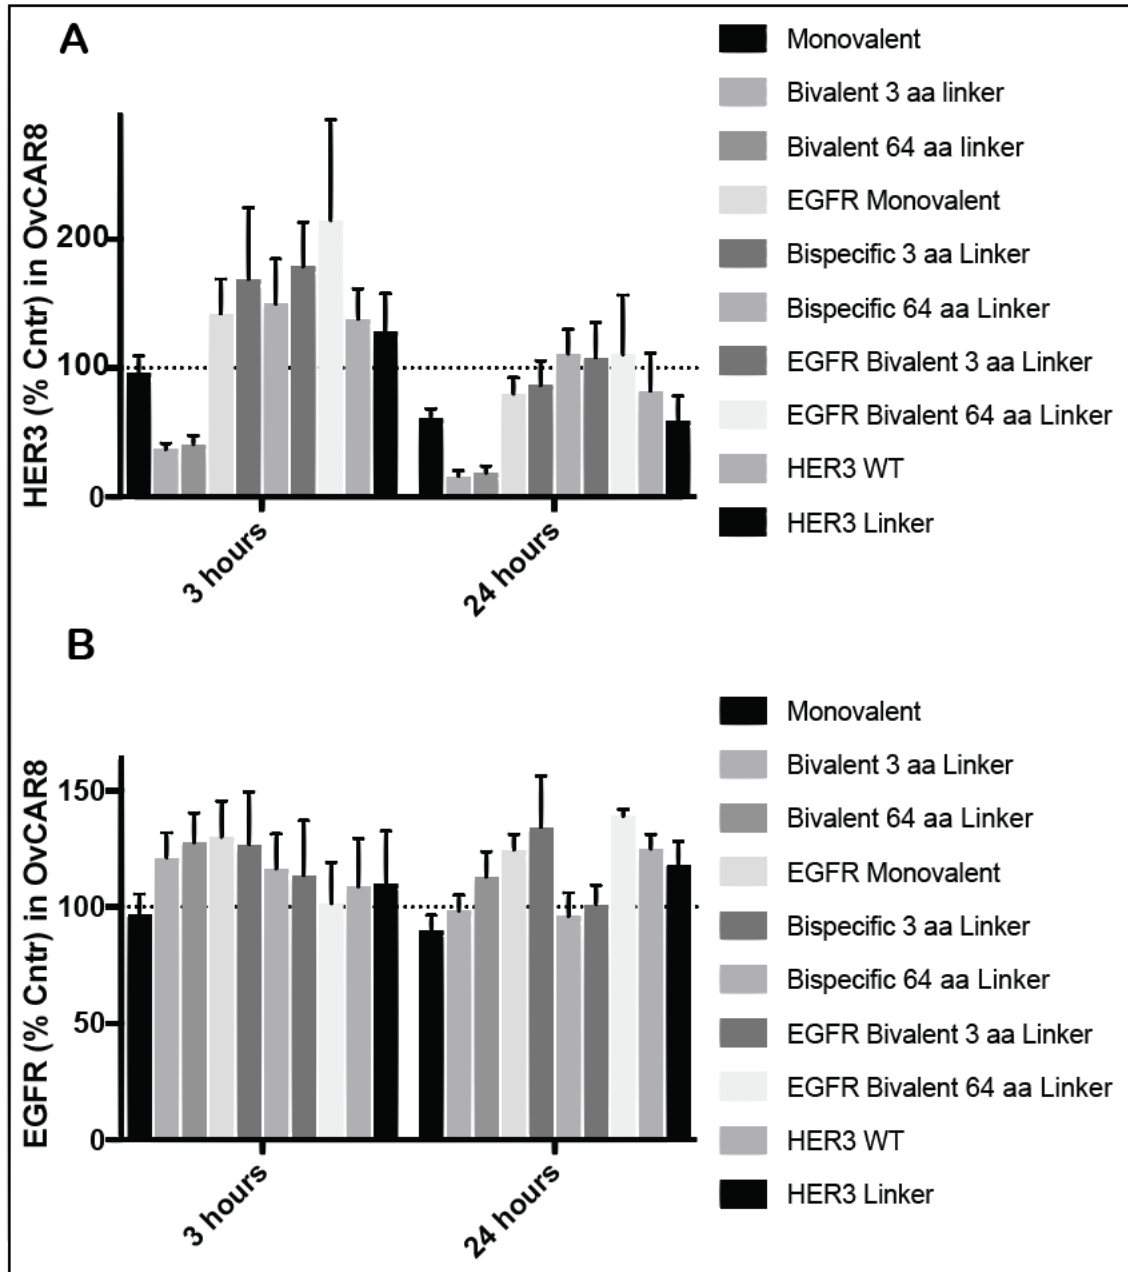

Figure S4

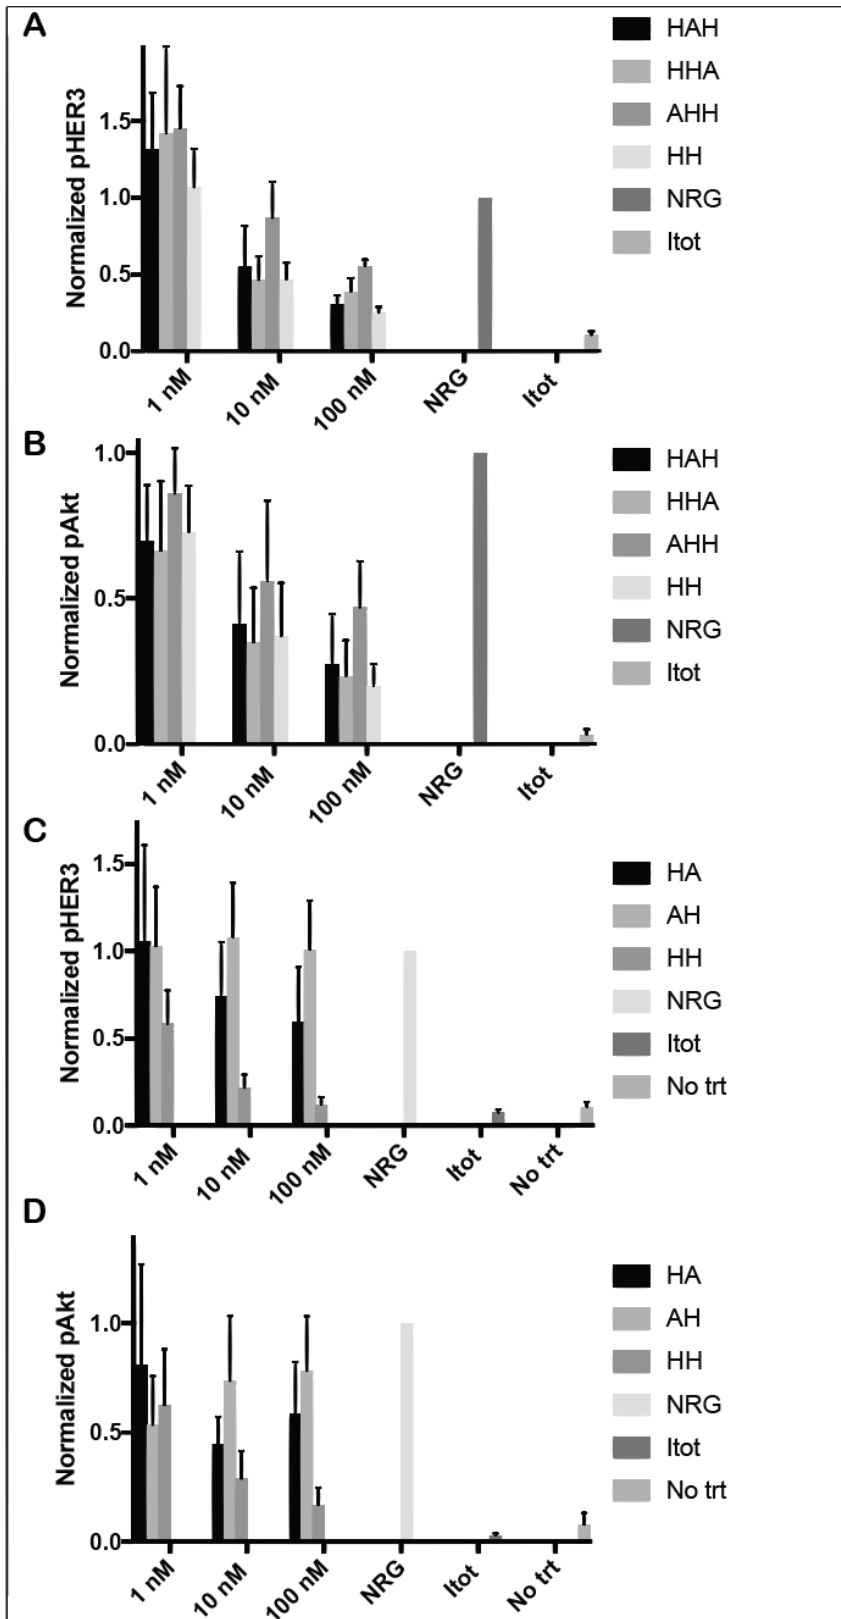

Figure S5

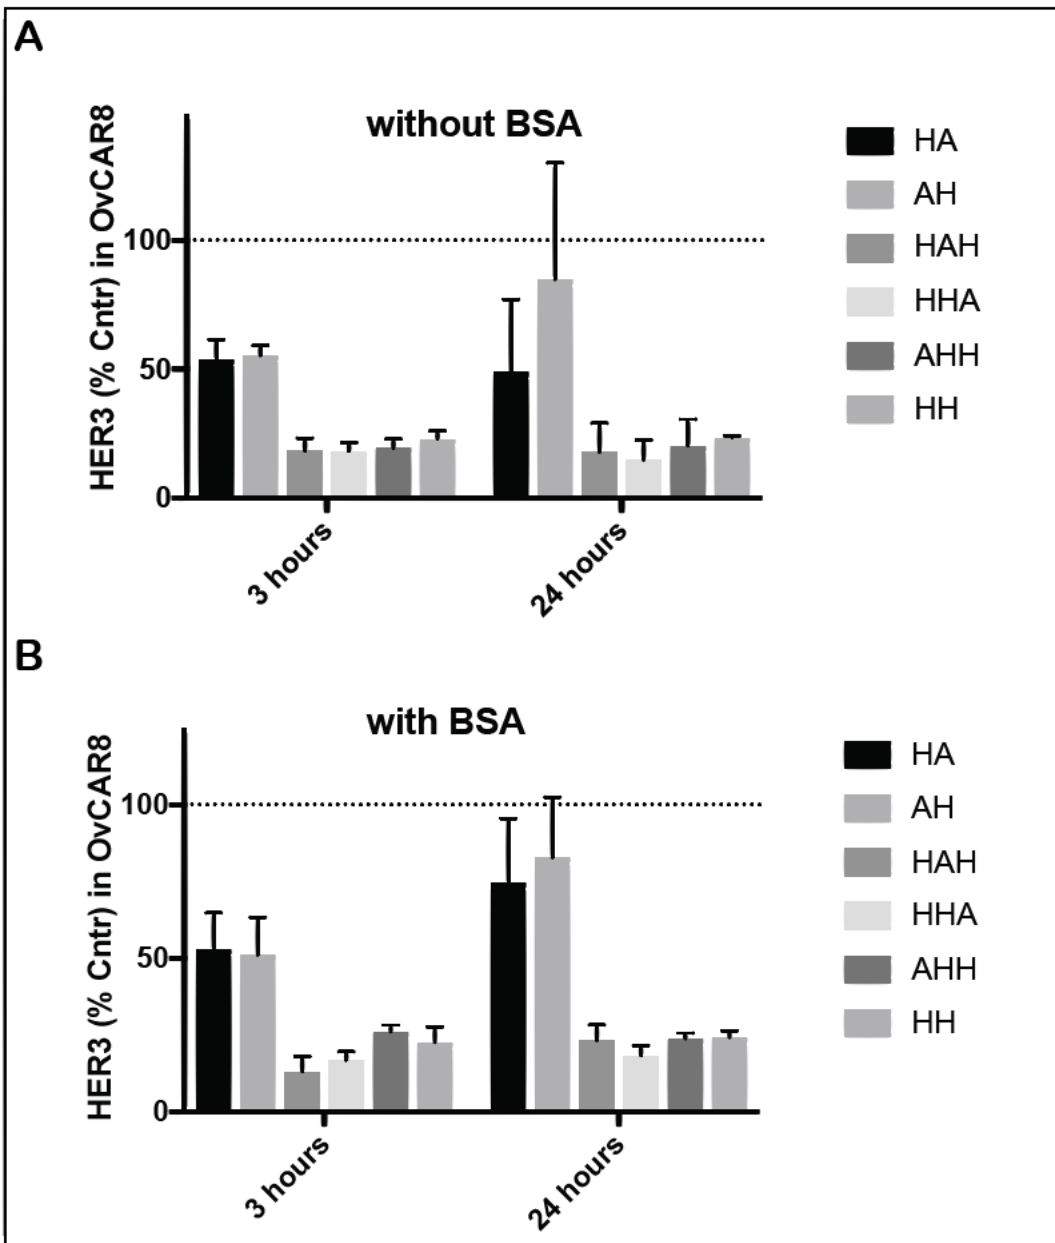

Figure S6

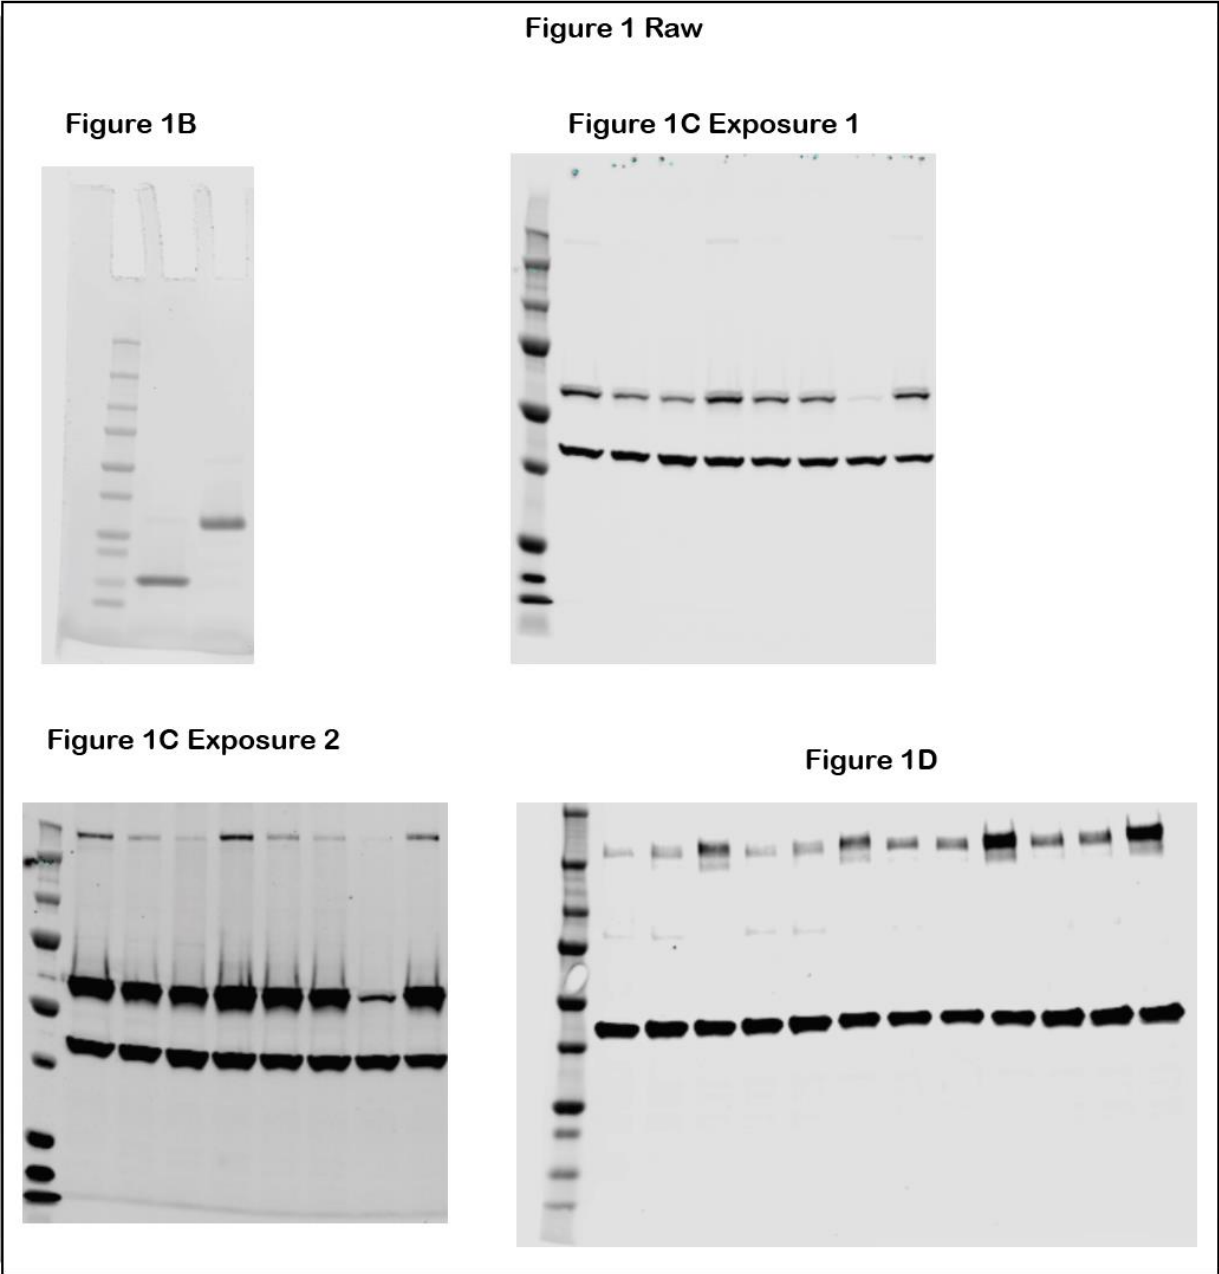

Figure S7

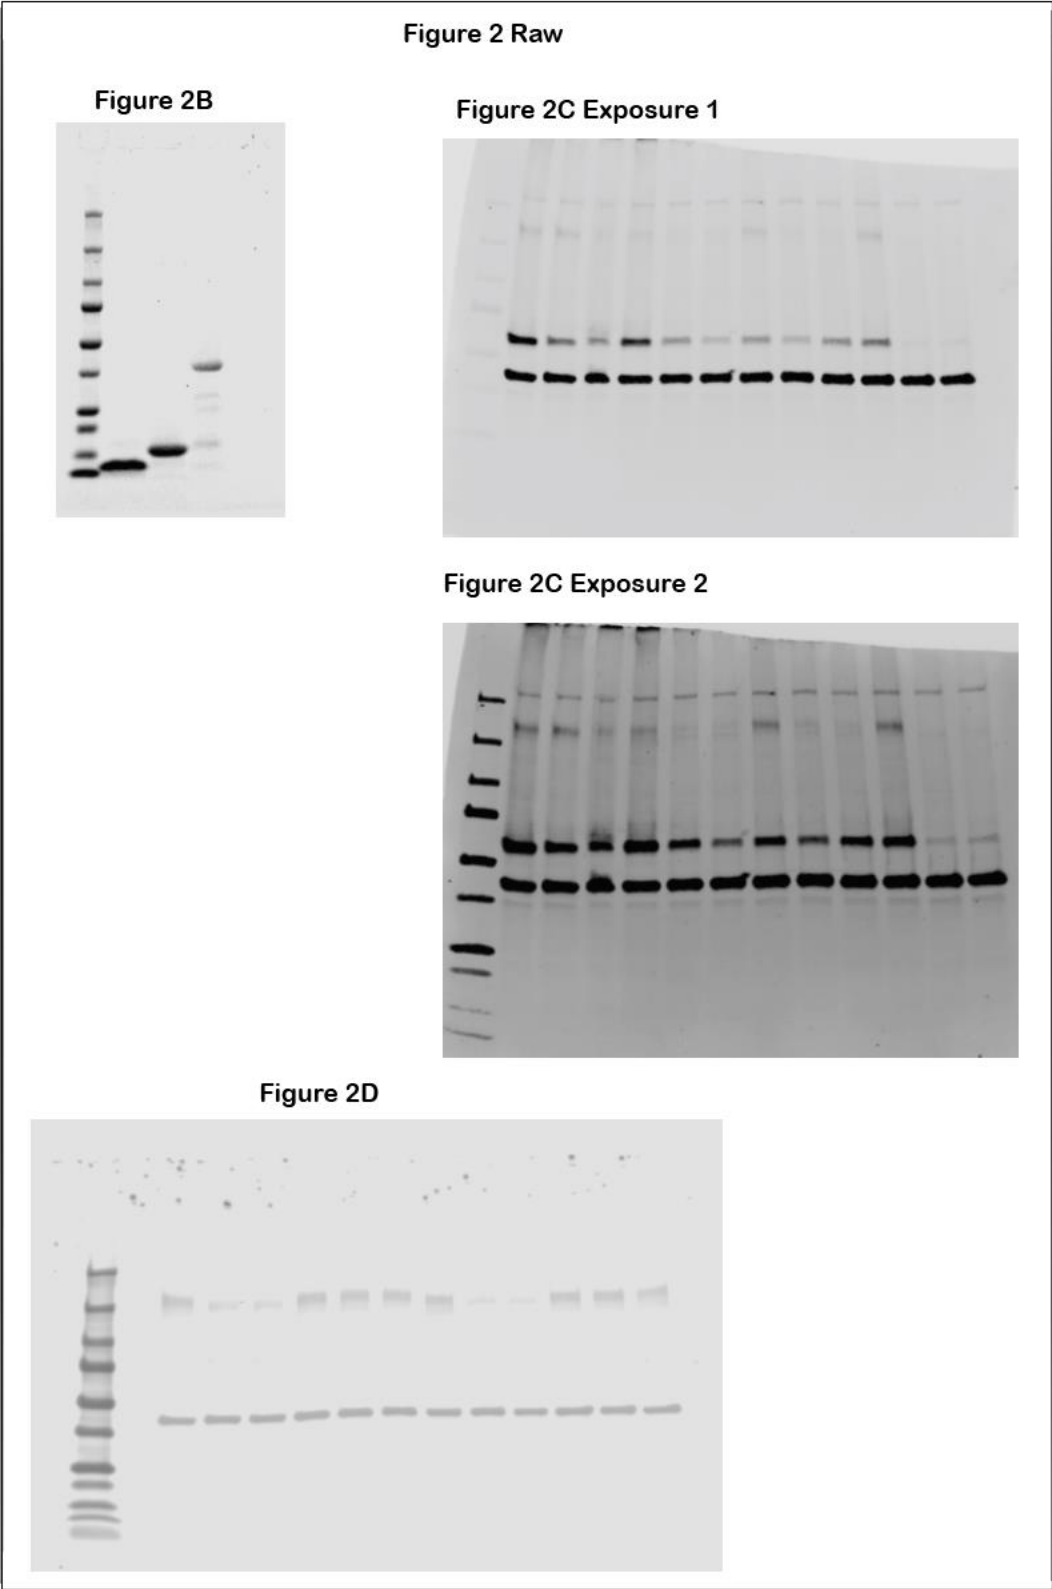

Figure S8

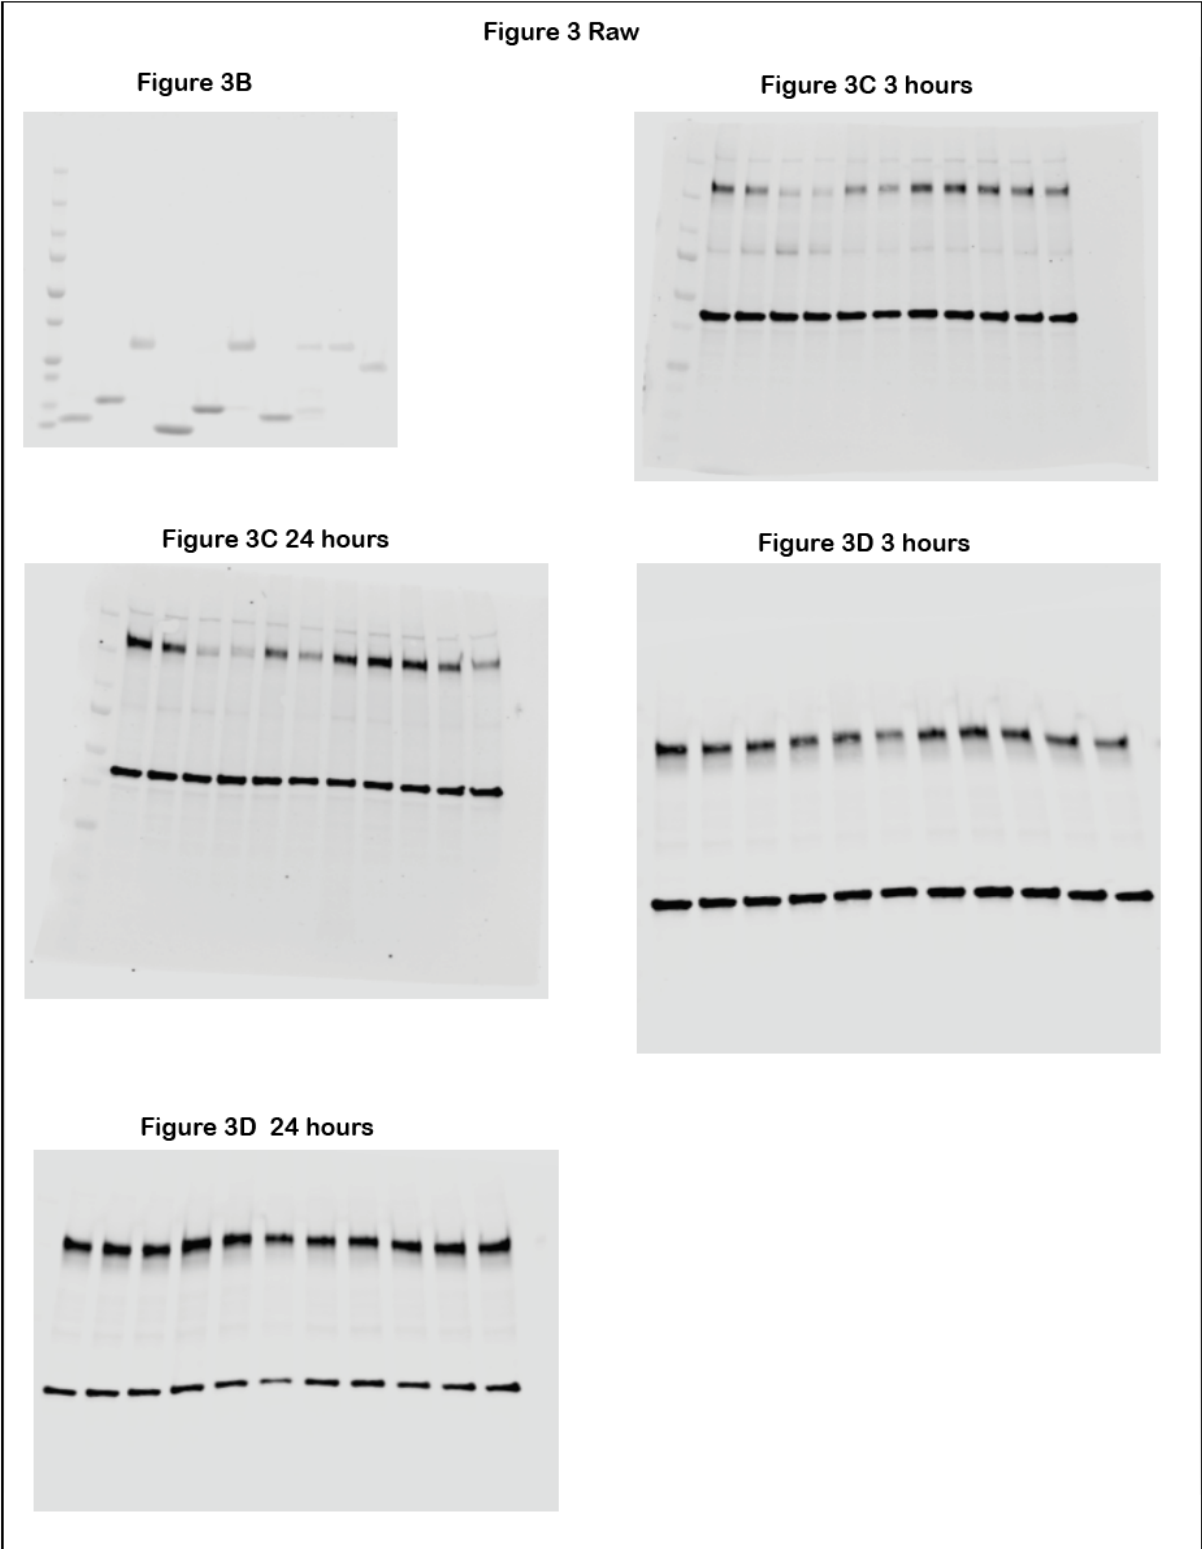

Figure S9

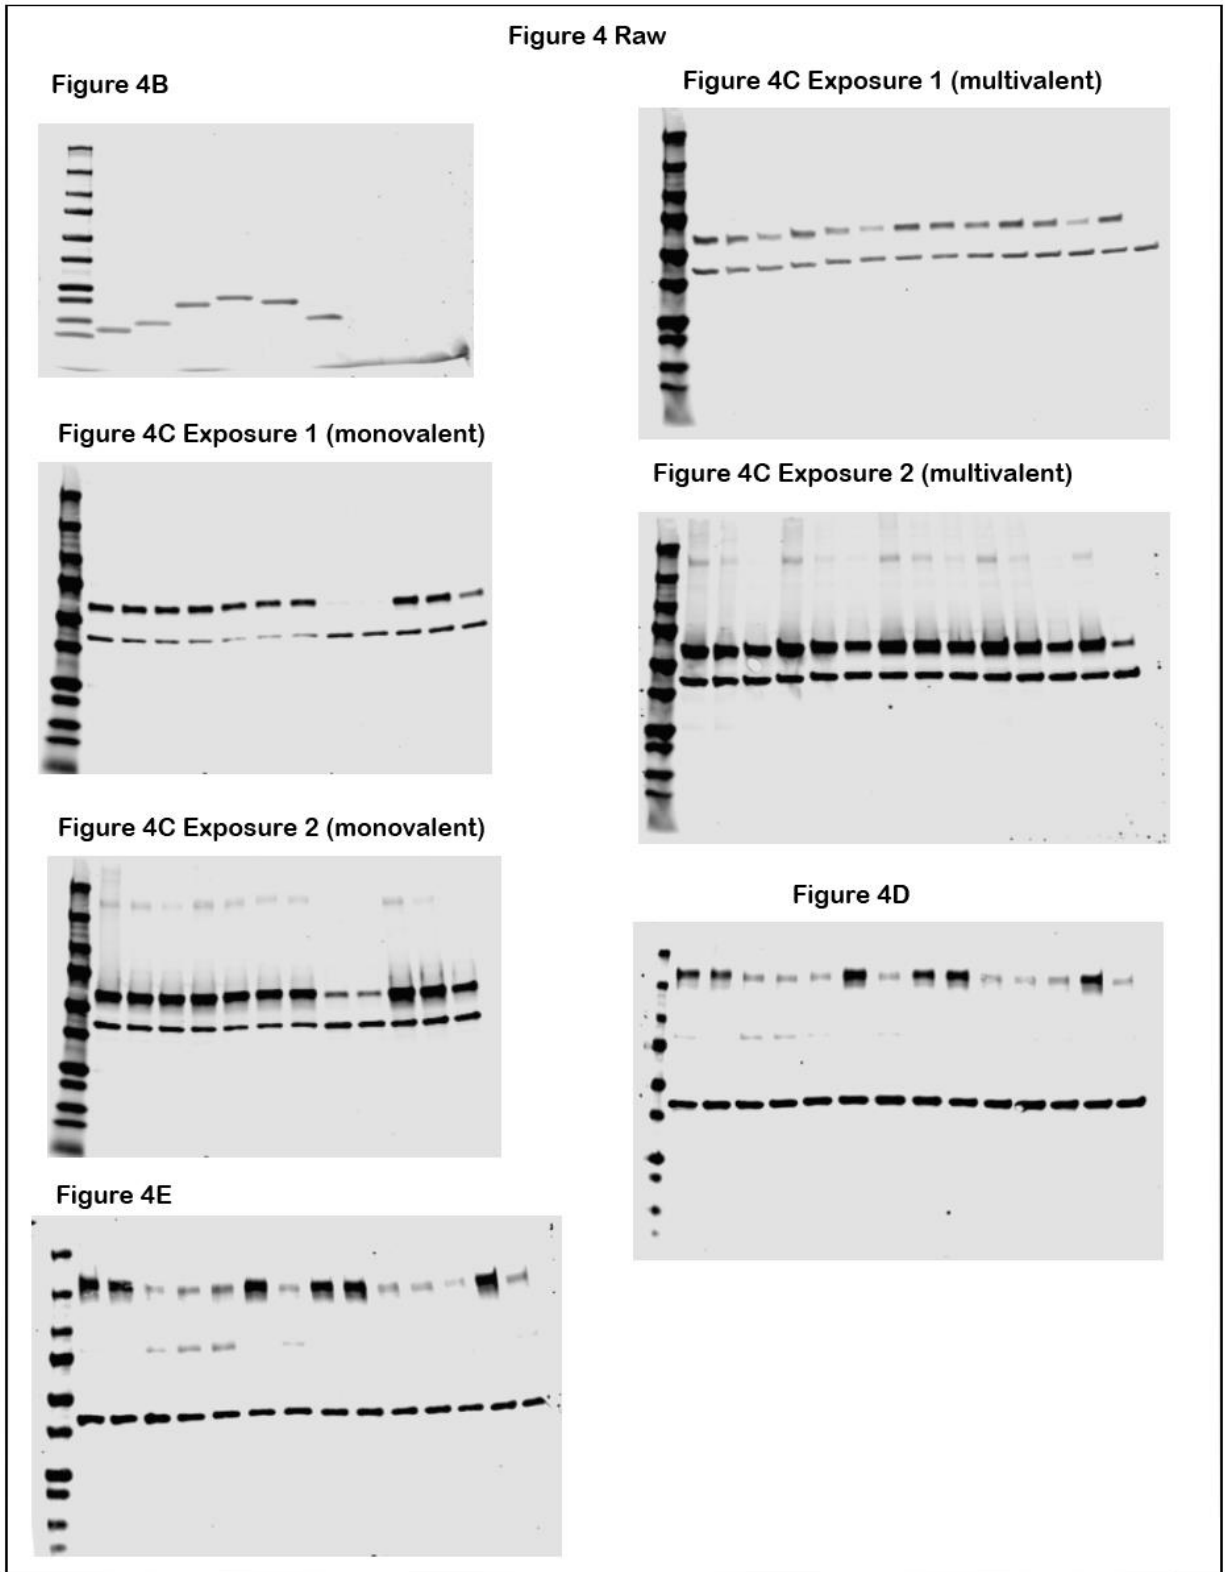

Supplement: NIHMS1590831-supplement-Supplemental_Data.pdf [file NIHMS1590831-supplement-Supplemental_Data.pdf]
